# Supplementary material
Source: publisher figshare collection journal article supplement (https://acs.figshare.com/ndownloader/files/5128558)

Supporting Information for

**A General Method for Patterning Gradients of Biomolecules  
on Surfaces Using Microfluidic Networks**

Xingyu Jiang<sup>1</sup>, Qiaobing Xu<sup>1</sup>, Stephan K. W. Dertinger<sup>1</sup>,

Abraham D. Stroock<sup>1</sup>, Tzung-may Fu<sup>2</sup>

and George M. Whitesides<sup>1\*</sup>

1. Department of Chemistry and Chemical Biology,

12 Oxford Street, Cambridge, MA 02138

2. Department of Earth and Planetary Sciences Harvard University,

20 Oxford Street, Cambridge, MA 02138

\* To whom correspondence should be addressed:  
gwhitesides@gmwgroup.harvard.edu

**Supporting information Figure 1.** Dimensions of the design of the microfluidic channel that incorporates CAMs.

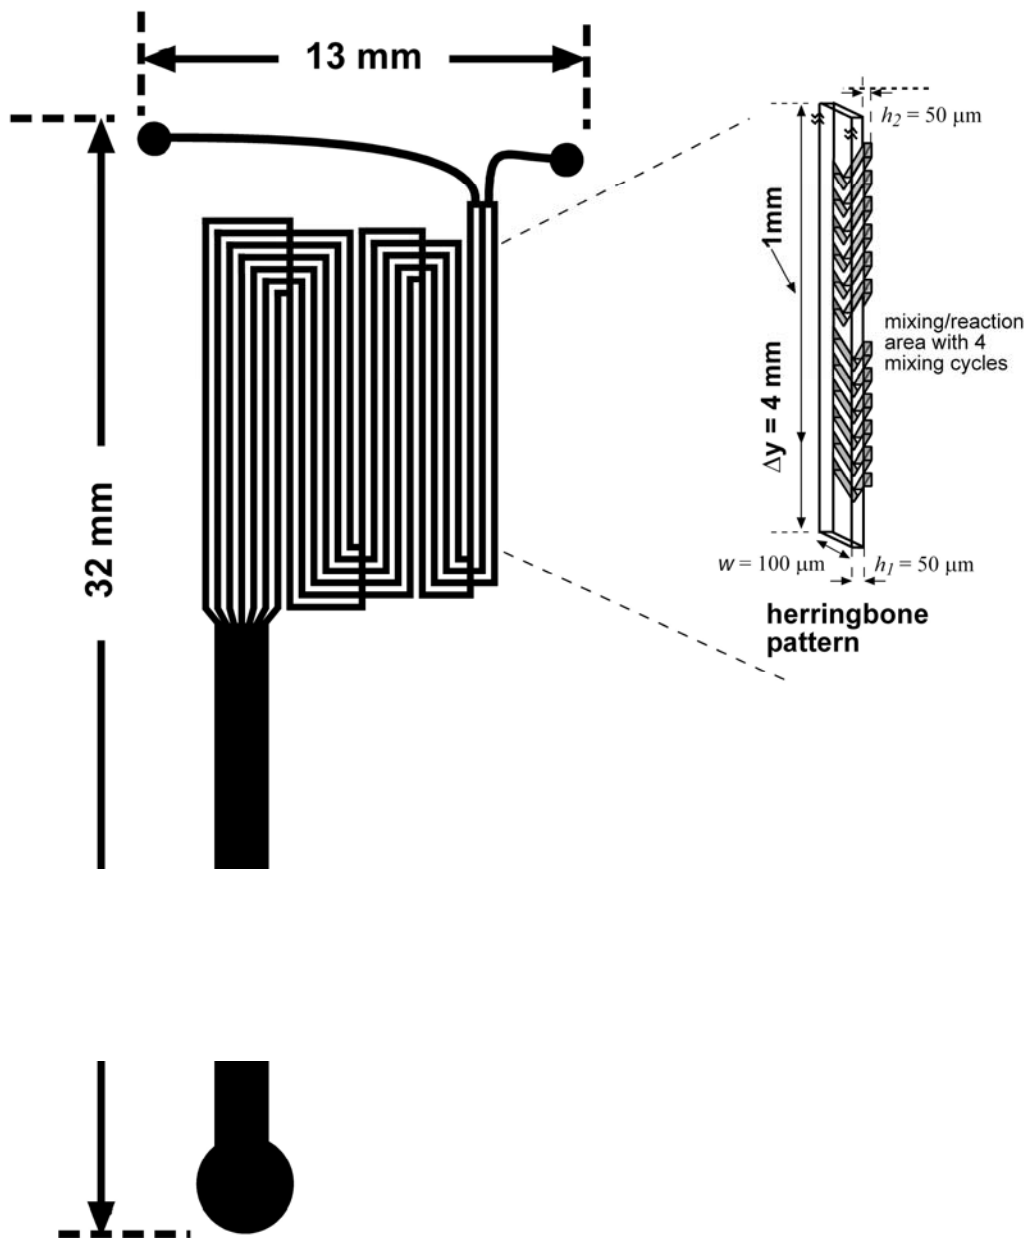

Supplement: Supplementary file 1 [file 5128558]
